# Supplementary material for: Red luminescent water stable lead-free 2D tin halide perovskite nanocrystals for photodetectors
Source: Royal Society of Chemistry journal article supplement (doi:10.1039/d4cc02404d), 2024-01-01
Supplement: d4cc02404d1.pdf [file d4cc02404d1.pdf]

**Supporting Information**

**Red Luminescent Water stable Lead-Free 2D Tin Halide Perovskite  
Nanocrystal for Photodetector**

Bharat Lal,<sup>a</sup> Praveen Kumar,<sup>b</sup> Sumit Kumar,<sup>a</sup> Ankush Saini,<sup>b</sup> Monojit Bag\*<sup>b</sup>, and Prasenjit  
Kar\*<sup>a</sup>

<sup>a</sup>Department of Chemistry, Indian Institute of Technology Roorkee, Uttarakhand-247667,  
India

<sup>b</sup>Department of Physics, Indian Institute of Technology Roorkee, Uttarakhand-247667, India

Corresponding Email address: kar.prasen@gmail.com, prasenjit.kar@cy.iitr.ac.in

| <b>Sl.No.</b> | <b>Contents</b>                                                                                                                              | <b>Page No.</b> |
|---------------|----------------------------------------------------------------------------------------------------------------------------------------------|-----------------|
| 1.            | Experimental section                                                                                                                         | S3              |
| 2.            | Characterization techniques                                                                                                                  | S3 – S4         |
| 3.            | Structure of the 2D perovskite material ( <b>Fig. S1</b> )                                                                                   | S4              |
| 4.            | Time dependent PL spectra in water ( <b>Fig. S2</b> )                                                                                        | S5              |
| 5.            | In <b>Fig. S3</b> (a) Photoresponsivity, (b) XPS fresh sample, (c) XPS analysis after 6 days of (Oleylamine) <sub>2</sub> SnI <sub>4</sub> . | S5              |
| 6.            | TGA Analysis ( <b>Fig. S4</b> )                                                                                                              | S6              |
| 7.            | TEM Elemental mapping ( <b>Fig. S5</b> )                                                                                                     | S6              |
| 8.            | Chronoamperometry of the photodetector under chopped light of 385 nm UV LED at power density 15 mW/cm <sup>2</sup> in ( <b>Fig. S6</b> ).    | S7              |
| 9.            | TEM-EDX Analysis ( <b>Table. S1</b> )                                                                                                        | S7              |
| 10.           | Resultant table for the rise and fall time of (oleylamine) <sub>2</sub> SnI <sub>4</sub> ( <b>Table. S2</b> )                                | S7              |

## Experimental Section

### Chemical Reagents

All the chemicals are Tin (II) oxide (SnO, Alfa Aesar 99%) and Oleylamine (Sigma Aldrich 70%), Hydrogen iodide (HI, Himedia, 59%), and Hypo phosphorous acid (H<sub>3</sub>PO<sub>2</sub>, Avra 50%) were purchased from a local vendor.

### Synthesis of (Oleylamine)<sub>2</sub>SnI<sub>4</sub>

We synthesized here perovskites nanomaterial (Oleylamine)<sub>2</sub>SnI<sub>4</sub> by the reported method of (OCTAm)<sub>2</sub>SnBr<sub>4</sub> synthesis methods<sup>1</sup>. Here we used (0.101 gm) Stannous oxide with 2.5 ml HI solution sonicated for some time in a round bottom flask until stannous oxide dissolved completely in hydroiodic acid after some time of sonication a yellow colored solution was obtained. After that 15 ml of hypophosphorous acid (H<sub>3</sub>PO<sub>2</sub>) was added into the Precursor solution to reduce Sn<sup>2+</sup> to Sn<sup>4+</sup> oxidation and then in this solution, 475 micro Litre Oleylamine, after mixing immediately this solution converted into a red precipitate solution. This solution is heated at 80 °C for 40 minutes in an oil bath with vigorous stirring until it is converted into a colorless solution. This colorless solution cools down in an ice bath for 4 to 5 hours, and then a red precipitate solution is obtained and gives bright red fluorescence under the U.V. Chamber. Finally, after the filtration process of this solution, we received our desired product.

### Characterization techniques-

#### 1. Absorption, excitation, and emission spectroscopy

Ultra Violet-Visible (UV-Vis) absorbance was measured on a Shimadzu UV-Vis 2600 spectrophotometer in the range of 200-800 nm. Photoluminescence spectra were recorded in the Cary eclipse fluorescence spectrophotometer. The emission spectra were recorded in the range of 300-900 nm wavelengths, while the excitation spectrum was recorded between 350-420 nm wavelength. The slit widths and step size of excitations and emissions were 2.0, 2.5, and 1.0, respectively.

#### 2. Powder X-ray Diffraction (P-XRD) measurement

Thin film XRD was performed on a Rigaku Smart Lab automated multipurpose X-ray diffractometer with a wavelength of 0.154 nm (Cu K $\alpha$ ) and an accelerating voltage of 9 kW in the range of 2 to 50.

#### 3. Field Emission Scanning Electron Microscopy (FE-SEM)

FE-SEM Carl Zeiss ultra was used to analyze the surface morphology of perovskite materials. The sample was gold-coated with an operating voltage of 20 kV.

#### 4. Transmission Electron Microscopy (TEM)

TEM images were collected by using M/S JOEL JEM 2100. A drop of diluted samples was deposited on a carbon-coated copper grid. Again, a drop was added before drying it, and drying was carried at room temperature.

#### 5. X-ray photoelectron Spectroscopy (XPS)

Surface analysis of the material was carried out on XPS with model no. PHI 5000 Versa Probe III. Step width – 0.05 eV, Temperature - 19-21 °C, Vacuum –  $10^{-7}$  Pascal, Pass Energy – 55 eV, Sweep 8 cycle, Source 1.48 Kev, Neutralizer 1.5 volt 20  $\mu$ A, Beam diameter 100 micrometer.

#### 6. Thermo-gravimetric analysis (TGA)

Thermal analyses were performed on SII 6300 EXSTAR. The sample was heated in a temperature range of 0- 800 °C at a 10 °C/min heating rate under a nitrogen atmosphere.

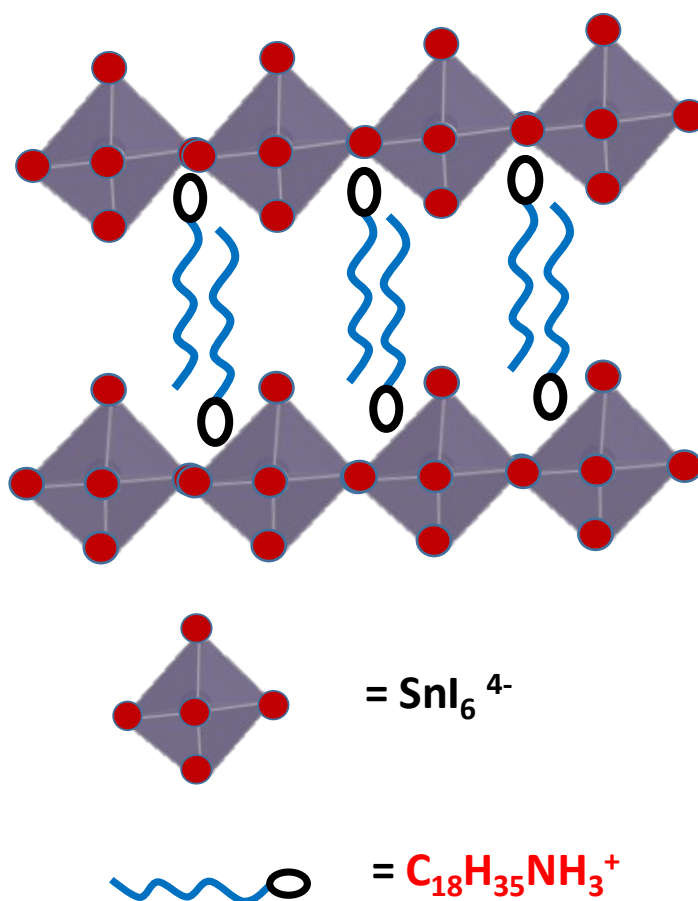

Fig. S1. Likely structure of the 2D two-dimensional perovskite material.

The synthesis of water-stable (Oleylamine)<sub>2</sub>SnI<sub>4</sub> perovskite nanoparticles following 9 days of storage in water, and the peaks remain unchanged in photoluminescence spectra presented

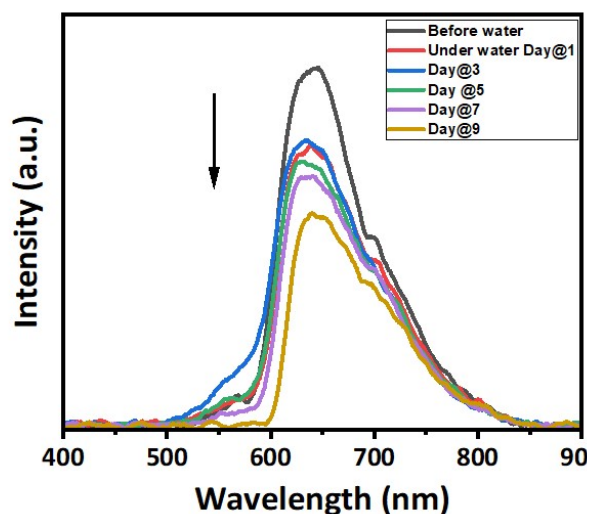

in Fig. S2 demonstrating that the synthesized perovskite nanomaterial is stable in water.

**Fig. S2.** Time-dependent PL spectra in water

The oxidation problem of Sn<sup>2+</sup> is also improved significantly in the photodetector device and the stability of 1 day under continuous illumination. After 24 hours, the same device is again tested under UV (385 nm) LED. The photodetector device was still in working condition. Thus, the material is also shown in Fig. S3b for fresh and after 6 days of exposure in an open-air environment respectively. There is no extra peak obtained in the XPS graph. It is also concluded the stability of perovskite materials in Sn<sup>2+</sup> is improved.

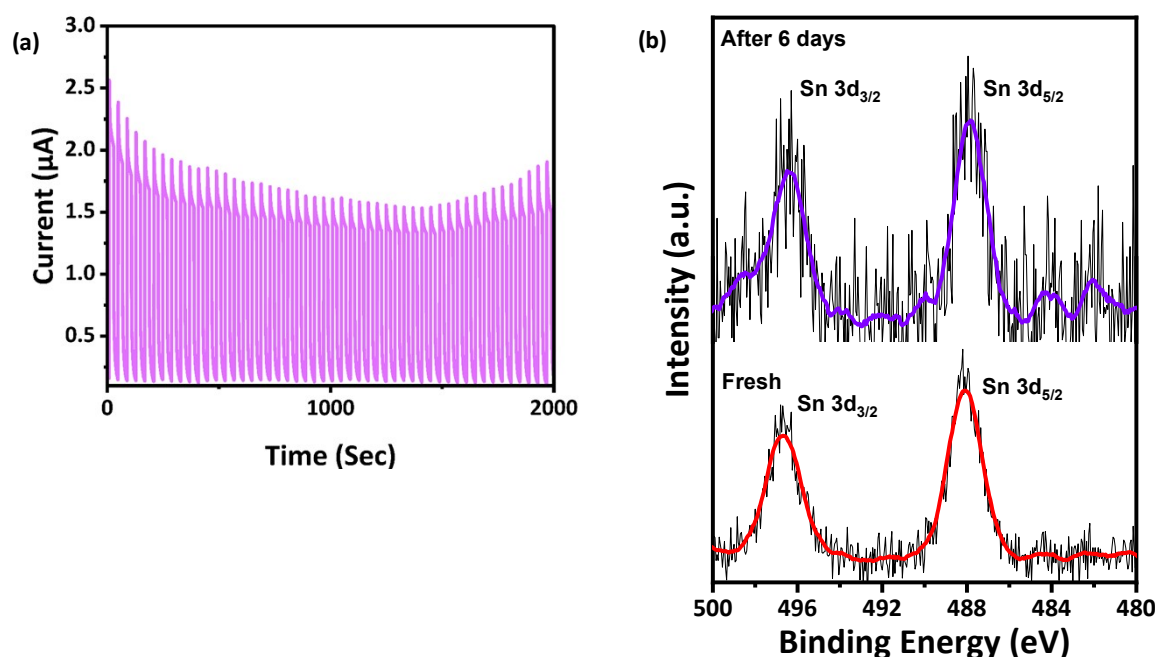

**Fig. S3.** (a) Photoresponsivity, (b) XPS fresh sample, (c) XPS after 6 days analysis of (Oleylamine)<sub>2</sub>SnI<sub>4</sub>.

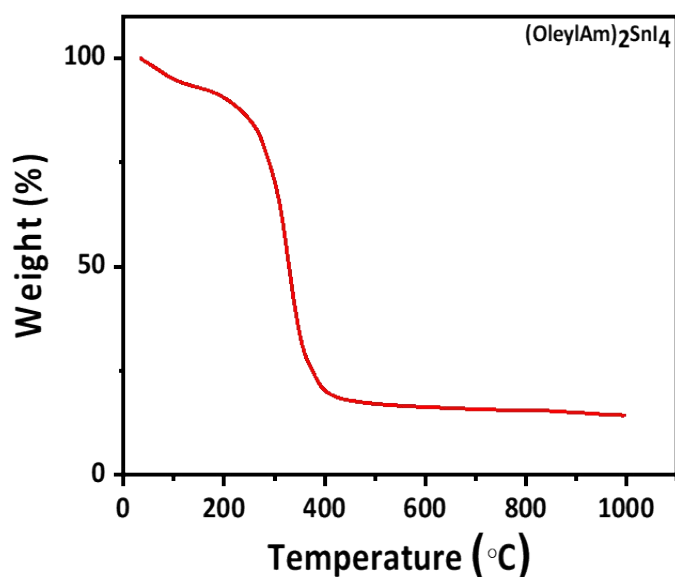

**Fig. S4.** TGA spectra of  $(\text{OleylAm})_2\text{SnI}_4$ .<sup>2,3</sup>

**Fig. S5.** (a) EDX of TEM image, Elemental mapping, (c) C, (d) N, (e) Sn, (f) I, of  $(\text{Oleylamine})_2\text{SnI}_4$  perovskites nanomaterial.

we have conducted chronoamperometry tests with zero external bias voltage on the device under continuous illumination of 385 nm UV LED at a power density of 15 mW/cm<sup>2</sup>, alternating between ON and OFF conditions in intervals of approximately 30 seconds. Our findings indicate that after 24 hours of continuous illumination in open air environment (R.H., 40-50%), the photodetector device remains stable and operational, with a minor decrease in photoresponse. It should note that some noise was introduced into the data, likely due to instability in the electrical connections.

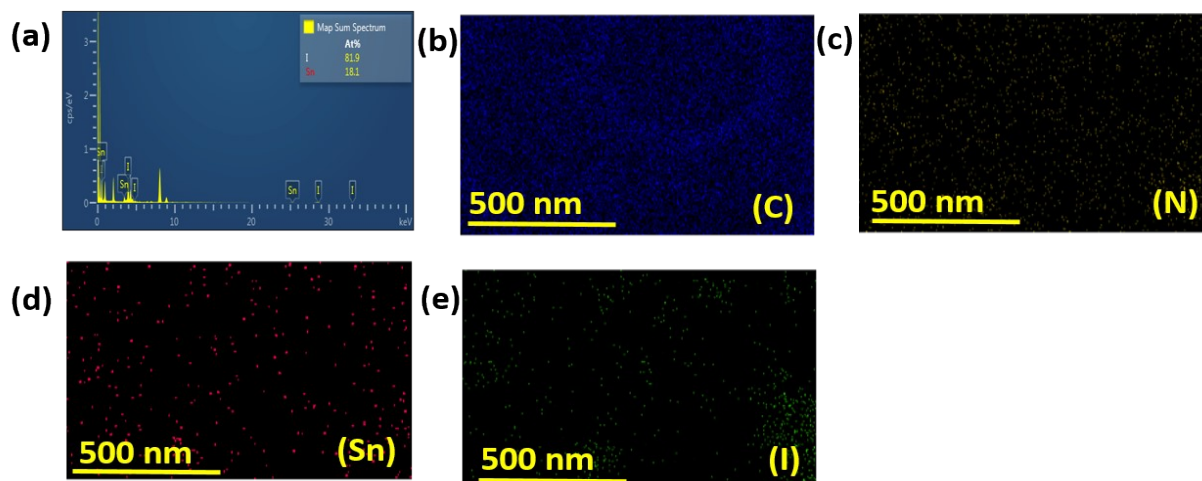

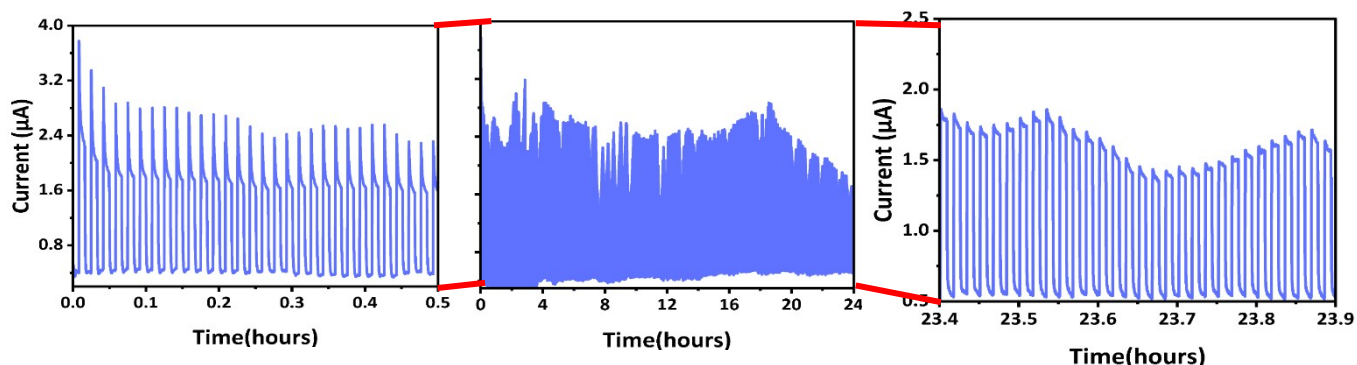

**Fig. S6.** Chronoamperometry of the photodetector under chopped light of 385 nm UV LED at power density 15 mW/cm<sup>2</sup>, keeping the device area 0.04 cm<sup>2</sup>.

**Table S1.** Elemental composition of TEM-EDX.

| Element | Atomic wt % |
|---------|-------------|
| Sn      | 81.9        |
| I       | 18.1        |

**Table S2.** Summary of the rise/fall time of the layered structured A<sub>2</sub>BX<sub>4</sub> type perovskites-based photodetectors.

| S.No. | Active Material                                                                                  | Rise/fall time        | Reference        |
|-------|--------------------------------------------------------------------------------------------------|-----------------------|------------------|
| 1.    | (1,4-butyl diammonium)CdBr <sub>4</sub>                                                          | 1.2/2.1 s             | 4                |
| 2.    | (C <sub>4</sub> H <sub>9</sub> NH <sub>3</sub> ) <sub>2</sub> PbBr <sub>4</sub> -nanobelts       | 340/500 ms            | 5                |
| 3.    | (C <sub>4</sub> H <sub>9</sub> NH <sub>3</sub> ) <sub>2</sub> PbBr <sub>4</sub> -microplatelates | 280/550 ms            | 5                |
| 4.    | (PEA) <sub>2</sub> SnI <sub>4</sub>                                                              | 0.37/3.05 s           | 6                |
| 5.    | (PEA) <sub>2</sub> SnI <sub>4</sub>                                                              | 630/3600 ms           | 7                |
| 6.    | BA <sub>2</sub> SnI <sub>4</sub>                                                                 | 2.62/0.3 s            | 8                |
| 7.    | (4-FEPA) <sub>2</sub> SnI <sub>4</sub>                                                           | 151 ms                | 9                |
| 8.    | <b>(OleylAm)<sub>2</sub>SnI<sub>4</sub></b>                                                      | <b>910 µs/1.28 ms</b> | <b>This work</b> |

## References

- 1 A. Wang, Y. Guo, Z. Zhou, X. Niu, Y. Wang, F. Muhammad, H. Li, T. Zhang, J. Wang, S. Nie and Z. Deng, *Chem. Sci.*, 2019, **10**, 4573–4579.
- 2 G. T. Shechkov, I. A. Pevneva and O. A. Meshkova, *Russ. J. Appl. Chem*, 2003, **76**, 8.
- 3 F. Lan, J. Bai and H. Wang, *RSC Adv.*, 2018, **8**, 16866–16872.
- 4 Y. Wang, C. Ji, X. Liu, S. Han, J. Zhang, Z. Sun, A. Khan and J. Luo, *Inorg. Chem. Front.*, 2018,**5**, 2450-2455.
- 5 B.-H. Zhu, Z. He, Yao, J.-S. Yao, C. Chen, K.-H. Wang, H.B. Yao, J.-W. Liu, S.H. Yu, *Adv. Opt. Mater.*, 2017, **6**(3), 1701029.
- 6 L. Qian, Y. Sun, M. Sun, Z. Fang, L. Lin Li, D. Xie, C. Chun Li and L. Liming Ding, *J. Mater. Chem. C*, 2019,**7**, 5353-5358.
- 7 L. Qian, Y. Sun, M. Wu, C. Li, D. Xie, L. Ding and G. Shi, *Nanoscale*, 2018, **10**, 6837-6843.
- 8 Y. Yang, H. Zhang, S. Hou, T. Wang, W. Chen, S. Xian, Z. Zhang, Y. Mao, *Appl. Phys. Lett.*, 2021, **119**, 161106.
- 9 C. Han, Q. Wei, X. Jiang, B. Yao, H. Li, H. Chen, B. Li, P. Fu, W. Zhou and Z. Ning, *ACS Materials Lett.*, 2022, **4**, 5, 987–994.
